# Supplementary material for: Oral Antihyperglycemic Medication Nonadherence and Subsequent Hospitalization Among Individuals With Type 2 Diabetes
Source: Oxford University Press journal article supplement (doi:10.2337/diacare.27.9.2149), 2004-09-01
Supplement: 2149-sup-dc000347onlineappendix.doc [file 2149-sup-dc000347onlineappendix.doc]

**Appendix. ICD-9 codes included in Hospitalization-2001 variable.**

| Diabetes | 250 |
| --- | --- |
| Hypertension | 401-404 |
| Myocardial Infarction | 410 |
| Other Ischemic Diseases | 411-414 |
| Congestive Heart Failure | 428 |
| Other Forms of Heart Disease | 420-427, 429 |
| Stroke / TIA | 430-438 |
| Atherosclerosis | 440 |
| Other Arterial Diseases | 441-444, 446-448 |
